# Supplementary material
Source: PubMed Central journal article supplement (PMC2479608)
Supplement: 108.131441_1.pdf [file 108.131441_1.pdf]

## **Supplementary Materials**

Fourier transform infrared study of the photoreactions of plant phytochrome phyA using isotopically labeled chromophores and density functional theory calculations

Content:

Structures of *ZZZssa*- and *ZZZasa*- Phytochromobilin

Normal mode analysis of Phycocyanobilin and Phytochromobilin

1. Structural models for the protein bound Phytochromobilin chromophore

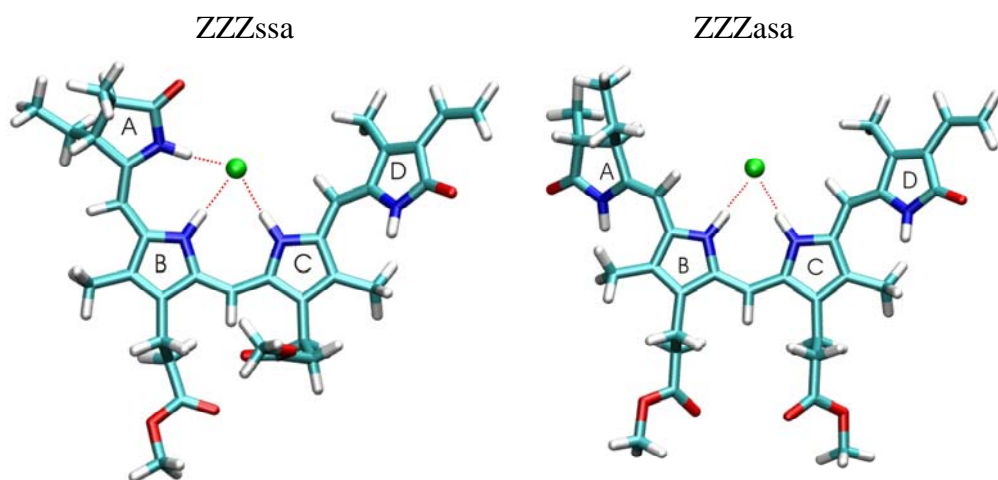

2. *Phytochromobilin molecule*

Table 2.1 : Calculated normal modes for the *ZZZasa* configuration of PΦB chromophores

| Mode | freq.<br>(n.a.)<br>(cm <sup>-1</sup> ) | IR int.<br>(km/mol) | PED                    | freq.<br>(N-D)<br>(cm <sup>-1</sup> ) | freq.<br>( <sup>13</sup> C10)<br>(cm <sup>-1</sup> ) |
|------|----------------------------------------|---------------------|------------------------|---------------------------------------|------------------------------------------------------|
| 44   | 1778                                   | 621                 | C=O (A)                | 1774                                  | 1778                                                 |
| 45   | 1764                                   | 131                 | C=O pps                | 1764                                  | 1764                                                 |
| 46   | 1762                                   | 257                 | C=O pps                | 1762                                  | 1762                                                 |
| 47   | 1743                                   | 800                 | C=O (D)                | 1738                                  | 1743                                                 |
| 48   | 1643                                   | 373                 | C=C (vinyl)            | 1641                                  | 1643                                                 |
| 49   | 1642                                   | 815                 | C=C (AB)               | 1633                                  | 1641                                                 |
| 50   | 1625                                   | 256                 | C=C (CD)               | 1619                                  | 1624                                                 |
| 51   | 1599                                   | 2321                | C-C (BC), CH rock (BC) | 1591                                  | 1578                                                 |
| 52   | 1575                                   | 16                  | C=C (D)                | 1574                                  | 1575                                                 |
| 53   | 1565                                   | 146                 | N-H ip (B,C)           | 1057                                  | 1565                                                 |
| 54   | 1526                                   | 86                  | C-C                    | 1525                                  | 1526                                                 |
| 55   | 1518                                   | 11                  | C-C                    | 1516                                  | 1518                                                 |
| 56   | 1510                                   | 532                 | C-C, N-H ip (B,C)      | 1028                                  | 1506                                                 |

Table 2.2 : Calculated normal modes for the *ZZZssa* configuration of PΦB chromophores

| Mode | freq.<br>(n.a.)<br>(cm <sup>-1</sup> ) | IR int.<br>(km/mol) | PED                  | freq.<br>(N-D)<br>(cm <sup>-1</sup> ) | freq.<br>( <sup>13</sup> C10)<br>(cm <sup>-1</sup> ) |
|------|----------------------------------------|---------------------|----------------------|---------------------------------------|------------------------------------------------------|
| 44   | 1784                                   | 287                 | C=O (A)              | 1779                                  | 1784                                                 |
| 45   | 1752                                   | 112                 | C=O pps              | 1752                                  | 1752                                                 |
| 46   | 1745                                   | 406                 | C=O pps              | 1744                                  | 1745                                                 |
| 47   | 1741                                   | 593                 | C=O (D)              | 1735                                  | 1741                                                 |
| 48   | 1644                                   | 41                  | C=C (vinyl),C=C (CD) | 1642                                  | 1644                                                 |

|    |      |      |                       |      |      |
|----|------|------|-----------------------|------|------|
| 49 | 1627 | 53   | C=C (CD), C=C (vinyl) | 1622 | 1627 |
| 50 | 1623 | 564  | C=C (AB), C-C (BC)    | 1613 | 1615 |
| 51 | 1597 | 1466 | C-C (AB), C-C (B)     | 1589 | 1585 |
| 52 | 1574 | 8    | C=C (D)               | 1573 | 1574 |
| 53 | 1559 | 343  | N-H ip (B,C)          | 1063 | 1558 |
| 54 | 1547 | 962  | C-C (B)               | 1545 | 1545 |
| 55 | 1525 | 99   | N-H ip (C)            | 1037 | 1523 |
| 56 | 1502 | 120  | C-C (B)               | 1505 | 1502 |

Table 2.3: Calculated normal modes for the *ZZEasa* configuration of PΦB chromophores

| Mode | freq.<br>(n.a.)<br>(cm <sup>-1</sup> ) | IR int<br>(km/mol) | PED                    | freq.<br>(N-D)<br>(cm <sup>-1</sup> ) | freq.<br>( <sup>13</sup> C10)<br>(cm <sup>-1</sup> ) |
|------|----------------------------------------|--------------------|------------------------|---------------------------------------|------------------------------------------------------|
| 44   | 1779                                   | 683                | C=O (A)                | 1775                                  | 1779                                                 |
| 45   | 1768                                   | 245                | C=O pps                | 1768                                  | 1768                                                 |
| 46   | 1752                                   | 219                | C=O pps                | 1752                                  | 1752                                                 |
| 47   | 1743                                   | 880                | C=O (D)                | 1737                                  | 1743                                                 |
| 48   | 1639                                   | 1212               | C=C (AB)               | 1634                                  | 1639                                                 |
| 49   | 1635                                   | 5                  | C=C (vinyl)            | 1631                                  | 1635                                                 |
| 50   | 1608                                   | 132                | C=C (CD)               | 1604                                  | 1608                                                 |
| 51   | 1598                                   | 2361               | C-C (BC), CH rock (BC) | 1591                                  | 1577                                                 |
| 52   | 1566                                   | 157                | N-H ip (B,C)           | 1058                                  | 1565                                                 |
| 53   | 1558                                   | 42                 | C=C (D)                | 1558                                  | 1557                                                 |
| 54   | 1533                                   | 122                | C-C (B)                | 1532                                  | 1532                                                 |
| 55   | 1514                                   | 239                | N-H ip (B,C)           | 1028                                  | 1512                                                 |
| 56   | 1507                                   | 234                | C-C (C), N-C (C)       | 1507                                  | 1506                                                 |

Table 2.4 : Calculated normal modes for the *ZZEssa* configuration of PΦB chromophores

| Mode | freq.<br>(n.a.)<br>(cm <sup>-1</sup> ) | IR int<br>(km/mol) | PED                   | freq.<br>(N-D)<br>(cm <sup>-1</sup> ) | freq.<br>( <sup>13</sup> C10)<br>(cm <sup>-1</sup> ) |
|------|----------------------------------------|--------------------|-----------------------|---------------------------------------|------------------------------------------------------|
| 44   | 1786                                   | 272                | C=O (A)               | 1781                                  | 1786                                                 |
| 45   | 1768                                   | 309                | C=O pps               | 1768                                  | 1768                                                 |
| 46   | 1748                                   | 220                | C=O pps               | 1748                                  | 1748                                                 |
| 47   | 1743                                   | 846                | C=O (D)               | 1737                                  | 1743                                                 |
| 48   | 1635                                   | 3                  | C=C (vinyl)           | 1635                                  | 1635                                                 |
| 49   | 1618                                   | 480                | C=C (AB), C-C (BC)    | 1609                                  | 1611                                                 |
| 50   | 1611                                   | 189                | C=C (CD)              | 1606                                  | 1610                                                 |
| 51   | 1594                                   | 1285               | C=C (AB), C-C (B)     | 1587                                  | 1582                                                 |
| 52   | 1561                                   | 208                | C=C (D), N-H ip (B,C) | 1558                                  | 1561                                                 |
| 53   | 1556                                   | 169                | C=C (D), N-H ip (B,C) | 1062                                  | 1556                                                 |
| 54   | 1546                                   | 1215               | C-C (B)               | 1543                                  | 1542                                                 |
| 55   | 1526                                   | 143                | N-H ip (C), C-C (AB)  | 1038                                  | 1523                                                 |
| 56   | 1500                                   | 179                | C-C (C), N-C (C)      | 1502                                  | 1500                                                 |

## 2. *Phycocyanobilin* molecule

Table 2.1 : Calculated normal modes for the *ZZZasa* configuration of PCB chromophores

| Mode | freq.(n.a.)<br>(cm <sup>-1</sup> ) | IR int.<br>(km/mol) | PED                       | freq.<br>(N-D)<br>(cm <sup>-1</sup> ) | freq.<br>( <sup>13</sup> C5)<br>(cm <sup>-1</sup> ) | freq.<br>( <sup>15</sup> N)<br>(cm <sup>-1</sup> ) |
|------|------------------------------------|---------------------|---------------------------|---------------------------------------|-----------------------------------------------------|----------------------------------------------------|
| 46   | 1775                               | 603                 | C=O (A)                   | 1772                                  | 1775                                                | 1776                                               |
| 47   | 1766                               | 145                 | C=O pps                   | 1766                                  | 1766                                                | 1766                                               |
| 48   | 1741                               | 843                 | C=O (D)                   | 1738                                  | 1741                                                | 1742                                               |
| 49   | 1737                               | 290                 | C=O pps                   | 1736                                  | 1737                                                | 1737                                               |
| 50   | 1644                               | 816                 | C=C (AB)                  | 1638                                  | 1622                                                | 1645                                               |
| 51   | 1634                               | 471                 | C=C (CD)                  | 1630                                  | 1634                                                | 1634                                               |
| 52   | 1629                               | 3                   | C=C (D)                   | 1628                                  | 1629                                                | 1628                                               |
| 53   | 1602                               | 2157                | C-C (BC),<br>CH rock (BC) | 1595                                  | 1600                                                | 1601                                               |
| 54   | 1567                               | 117                 | N-H ip (B,C)              |                                       | 1566                                                | 1558                                               |
| 55   | 1525                               | 21                  | C-C (C)                   | 1524                                  | 1525                                                | 1523                                               |
| 56   | 1516                               | 127                 | C-C (B)                   | 1515                                  | 1516                                                | 1515                                               |
| 57   | 1514                               | 336                 | N-H ip (B,C)              |                                       | 1513                                                | 1505                                               |

Table 2.2 : Calculated normal modes for the *ZZZssa* configuration of PCB chromophores

| Mode | freq.(n.a.)<br>(cm <sup>-1</sup> ) | IR int.<br>(km/mol) | PED                                     | freq.<br>(N-D)<br>(cm <sup>-1</sup> ) | freq.<br>( <sup>13</sup> C5)<br>(cm <sup>-1</sup> ) | freq.<br>( <sup>15</sup> N)<br>(cm <sup>-1</sup> ) |
|------|------------------------------------|---------------------|-----------------------------------------|---------------------------------------|-----------------------------------------------------|----------------------------------------------------|
| 46   | 1782                               | 289                 | C=O (A)                                 | 1778                                  | 1782                                                | 1782                                               |
| 47   | 1754                               | 130                 | C=O pps                                 | 1754                                  | 1754                                                | 1754                                               |
| 48   | 1742                               | 502                 | C=O pps                                 | 1742                                  | 1742                                                | 1472                                               |
| 49   | 1739                               | 643                 | C=O (D)                                 | 1735                                  | 1739                                                | 1740                                               |
| 50   | 1634                               | 145                 | C=C (CD)                                | 1632                                  | 1636                                                | 1636                                               |
| 51   | 1627                               | 2                   | C=C (D)                                 | 1627                                  | 1627                                                | 1627                                               |
| 52   | 1622                               | 584                 | C=C (AB), C-<br>C (BC), CH<br>rock (BC) | 1614                                  | 1617                                                | 1620                                               |
| 53   | 1596                               | 1403                | C-C (B), C=C<br>(AB)                    | 1589                                  | 1586                                                | 1594                                               |
| 54   | 1558                               | 410                 | N-H ip (B,C)                            | 1063                                  | 1556                                                | 1551                                               |
| 55   | 1545                               | 1046                | C-C (B)                                 | 1545                                  | 1540                                                | 1541                                               |
| 56   | 1523                               | 51                  | N-H ip (B,C)                            | 1055                                  | 1521                                                | 1515                                               |
| 57   | 1501                               | 111                 | C-C (C)                                 | 1504                                  | 1501                                                | 1500                                               |

Table 2.3 : Calculated normal modes for the *ZZEasa* configuration of PCB chromophores

| Mode | freq.(n.a.)<br>(cm <sup>-1</sup> ) | IR int.<br>(km/mol) | PED                       | freq.<br>(N-D)<br>(cm <sup>-1</sup> ) | freq.<br>( <sup>13</sup> C5)<br>(cm <sup>-1</sup> ) | freq.<br>( <sup>15</sup> N)<br>(cm <sup>-1</sup> ) |
|------|------------------------------------|---------------------|---------------------------|---------------------------------------|-----------------------------------------------------|----------------------------------------------------|
| 46   | 1778                               | 587                 | C=O (A)                   | 1772                                  | 1775                                                | 1776                                               |
| 47   | 1758                               | 142                 | C=O pps                   | 1758                                  | 1758                                                | 1758                                               |
| 48   | 1743                               | 816                 | C=O (D)                   | 1740                                  | 1743                                                | 1744                                               |
| 49   | 1740                               | 295                 | C=O pps                   | 1739                                  | 1740                                                | 1740                                               |
| 50   | 1642                               | 931                 | C=C (AB)                  | 1636                                  | 1621                                                | 1643                                               |
| 51   | 1620                               | 292                 | C=C (CD)                  | 1617                                  | 1620                                                | 1621                                               |
| 52   | 1613                               | 16                  | C=C (D)                   | 1612                                  | 1613                                                | 1613                                               |
| 53   | 1603                               | 2214                | C-C (BC),<br>CH rock (BC) | 1596                                  | 1601                                                | 1062                                               |
| 54   | 1564                               | 140                 | N-H ip (B,C)              |                                       | 1563                                                | 1555                                               |
| 55   | 1530                               | 83                  | C-C (B)                   | 1529                                  | 1529                                                | 1528                                               |
| 56   | 1515                               | 317                 | N-H ip (B,C)              |                                       | 1514                                                | 1507                                               |
| 57   | 1511                               | 94                  | C-C (B)                   | 1511                                  | 1511                                                | 1511                                               |

Table 2.4 : Calculated normal modes for the *ZZEssa* configuration of PCB chromophores

| Mode | freq.(n.a.)<br>(cm <sup>-1</sup> ) | IR int.<br>(km/mol) | PED                    | freq.<br>(N-D)<br>(cm <sup>-1</sup> ) | freq.<br>( <sup>13</sup> C5)<br>(cm <sup>-1</sup> ) | freq.<br>( <sup>15</sup> N)<br>(cm <sup>-1</sup> ) |
|------|------------------------------------|---------------------|------------------------|---------------------------------------|-----------------------------------------------------|----------------------------------------------------|
| 46   | 1784                               | 291                 | C=O (A)                | 1780                                  | 1784                                                | 1784                                               |
| 47   | 1774                               | 191                 | C=O pps                | 1774                                  | 1774                                                | 1774                                               |
| 48   | 1761                               | 254                 | C=O pps                | 1761                                  | 1761                                                | 1761                                               |
| 49   | 1741                               | 908                 | C=O (D)                | 1737                                  | 1741                                                | 1442                                               |
| 50   | 1620                               | 84                  | C=C (CD)               | 1617                                  | 1620                                                | 1621                                               |
| 51   | 1619                               | 613                 | C=C (AB), C-<br>C (BC) | 1613                                  | 1614                                                | 1617                                               |
| 52   | 1614                               | 28                  | C=C (D)                | 1610                                  | 1611                                                | 1614                                               |
| 53   | 1593                               | 1258                | C-C (B), C=C<br>(AB)   | 1587                                  | 1584                                                | 1591                                               |
| 54   | 1557                               | 350                 | N-H ip (B,C)           |                                       | 1556                                                | 1549                                               |
| 55   | 1542                               | 1122                | C-C (B)                | 1542                                  | 1538                                                | 1540                                               |
| 56   | 1521                               | 66                  | N-H ip (B,C)           |                                       | 1519                                                | 1513                                               |
| 57   | 1506                               | 206                 | C-C (C)                | 1507                                  | 1506                                                | 1504                                               |
